# Supplementary material
Source: PubMed Central journal article supplement (PMC3463320)
Supplement: supp_M112.384354_jbc.M112.384354-1.pdf [file supp_M112.384354_jbc.M112.384354-1.pdf]

Supplemental Figure 1

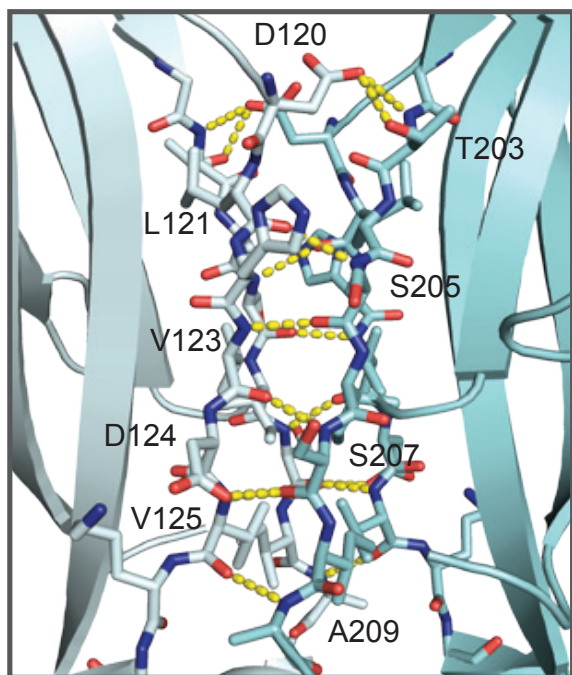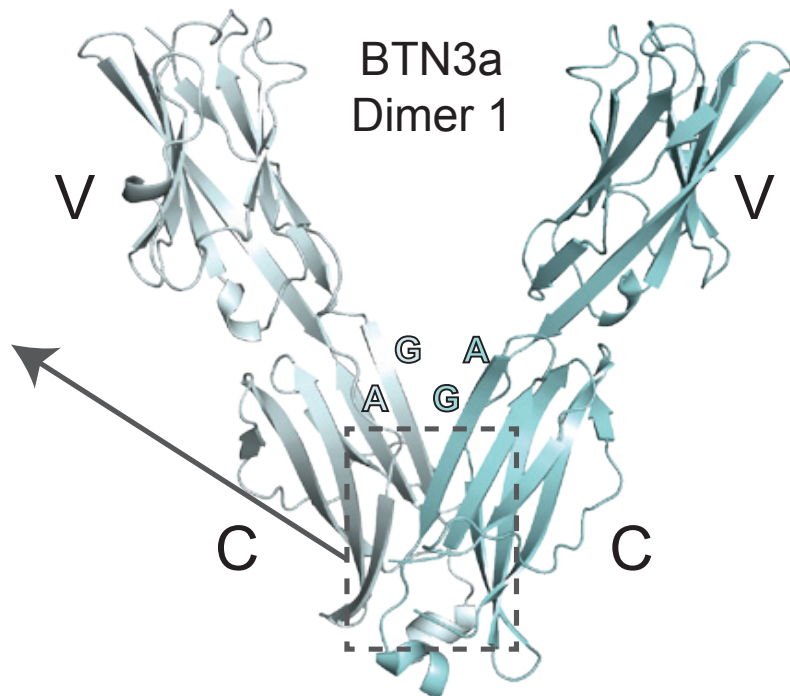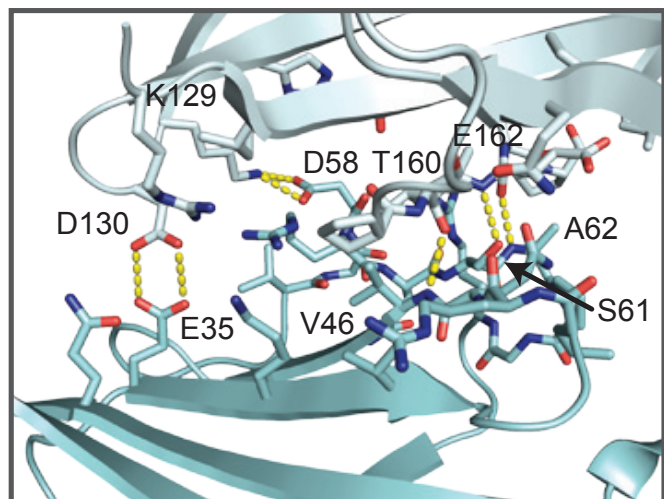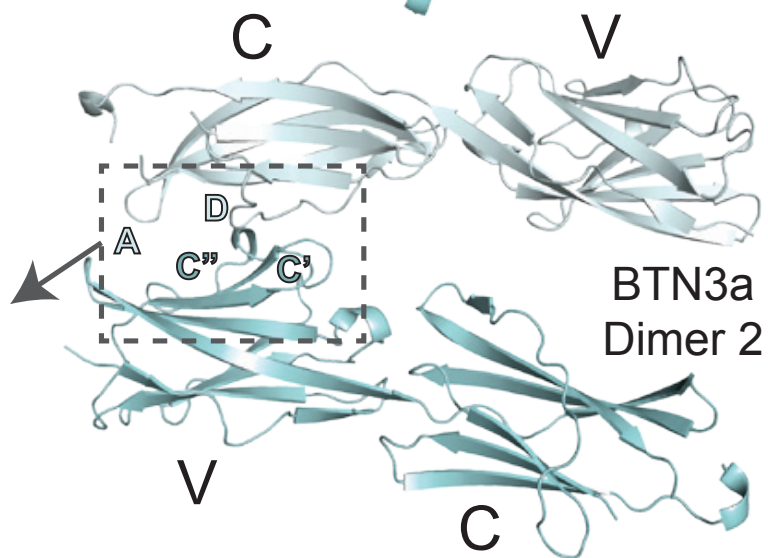

Supplemental Figure 2

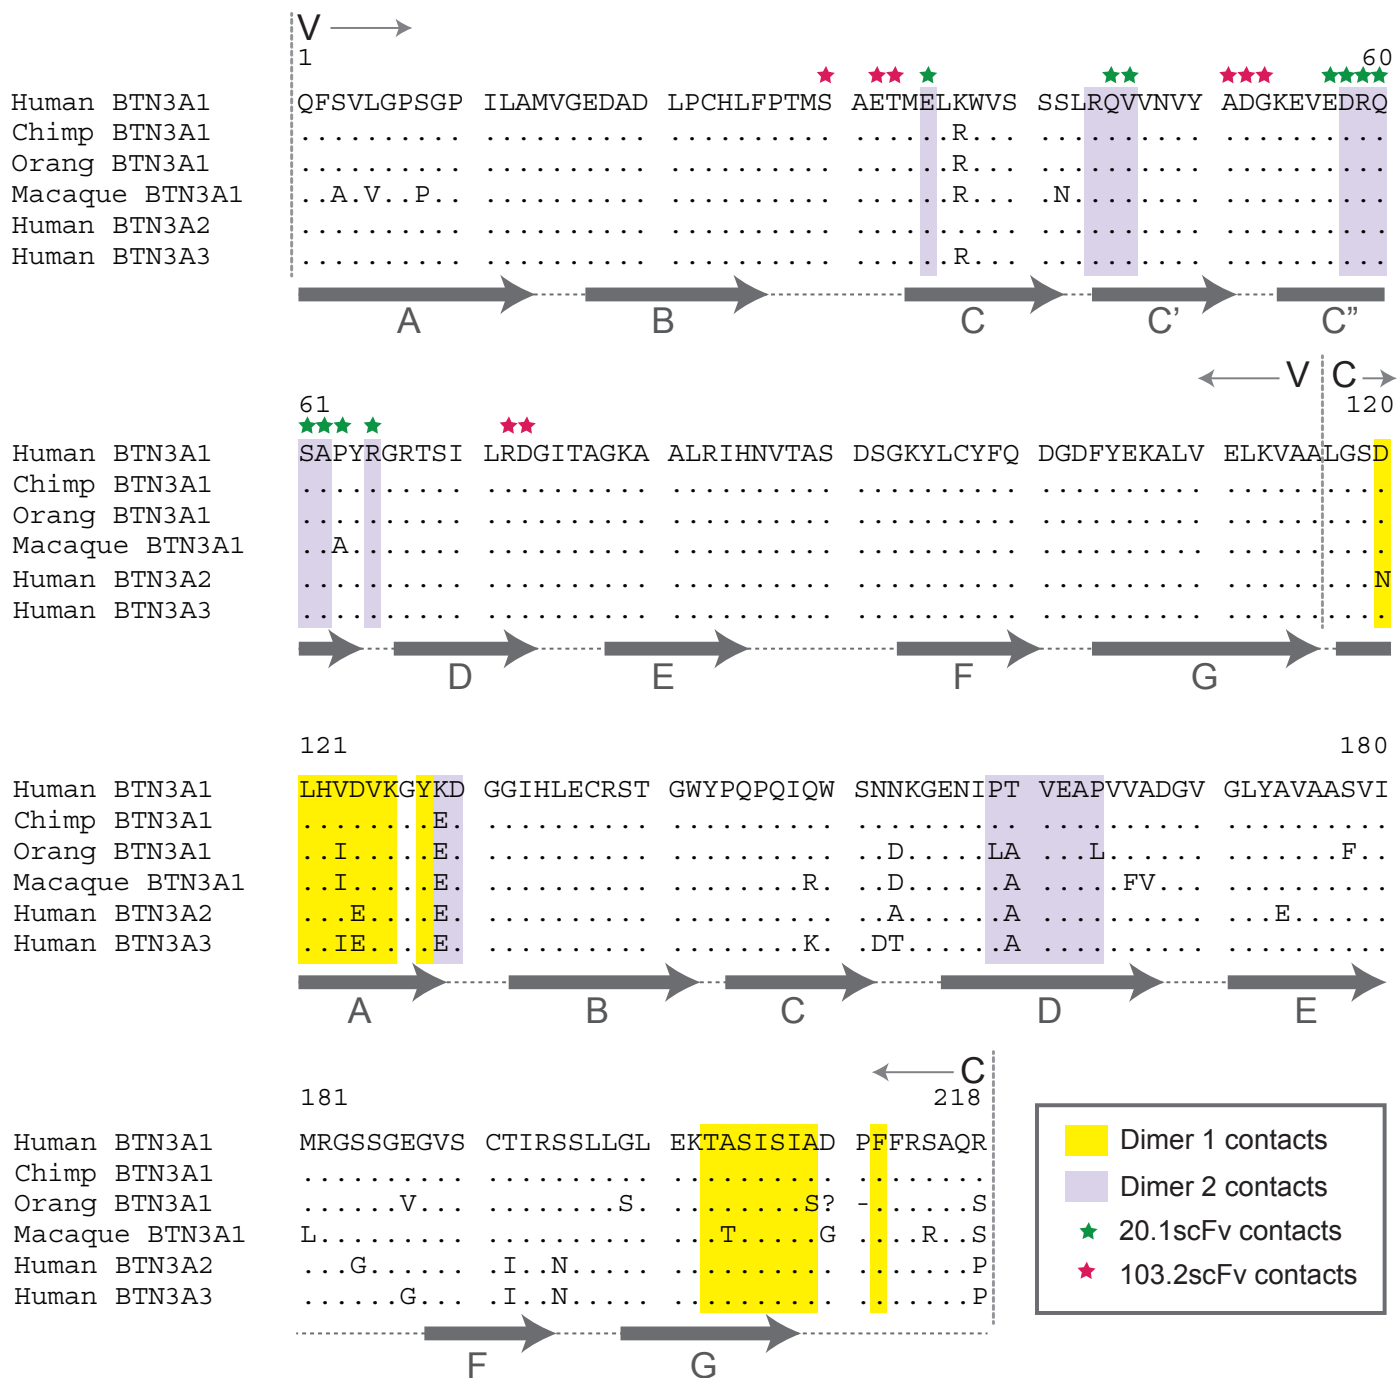

Supplemental Figure 3

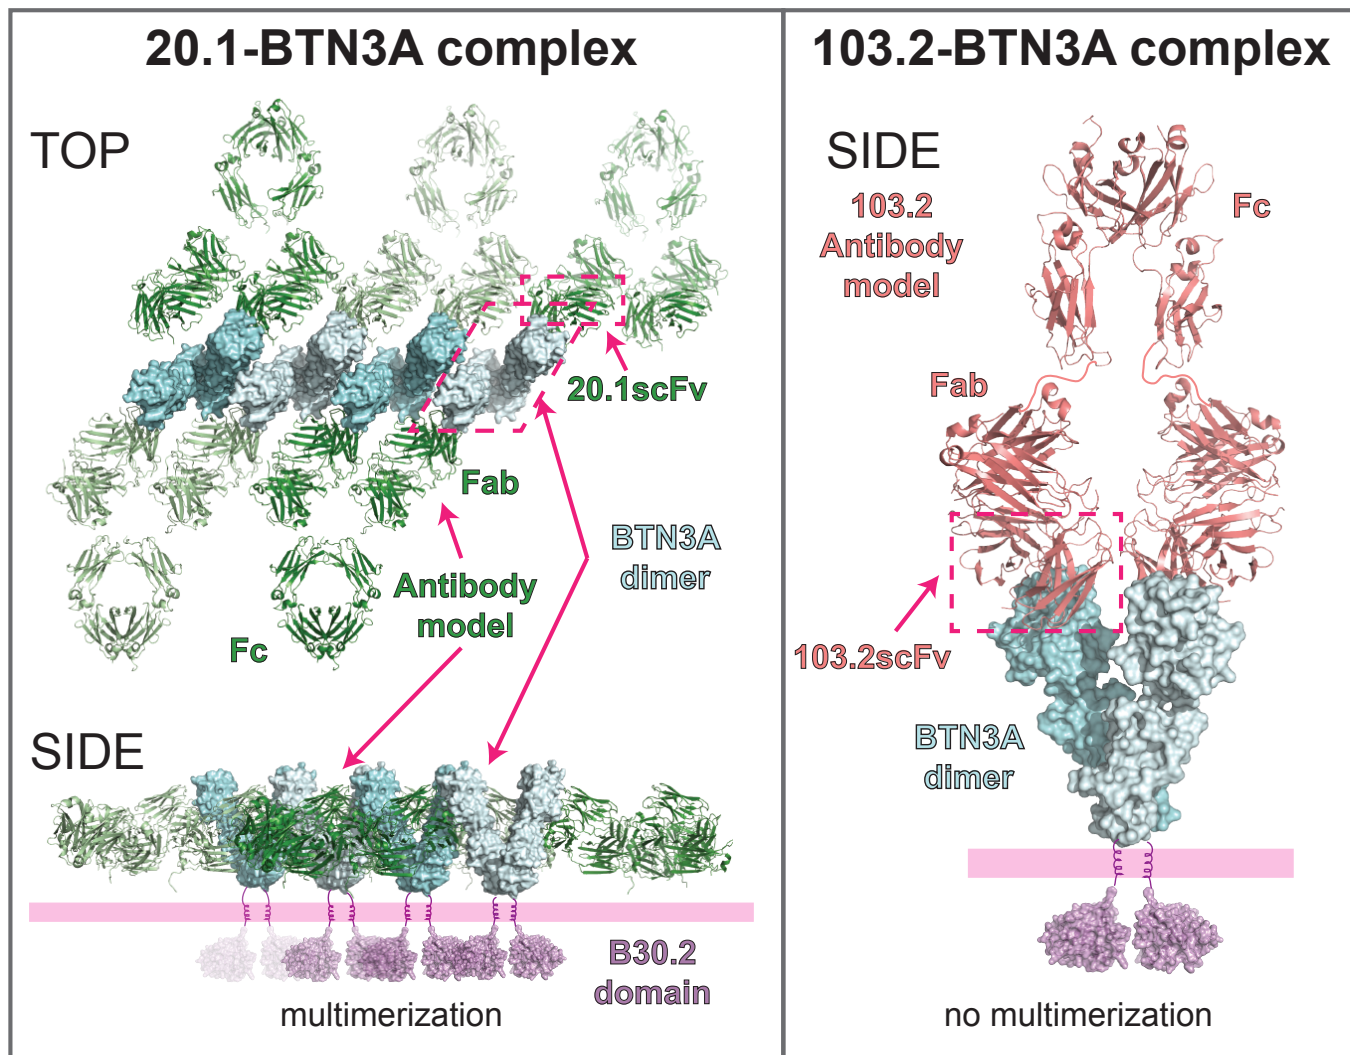

Supplemental Figure 4

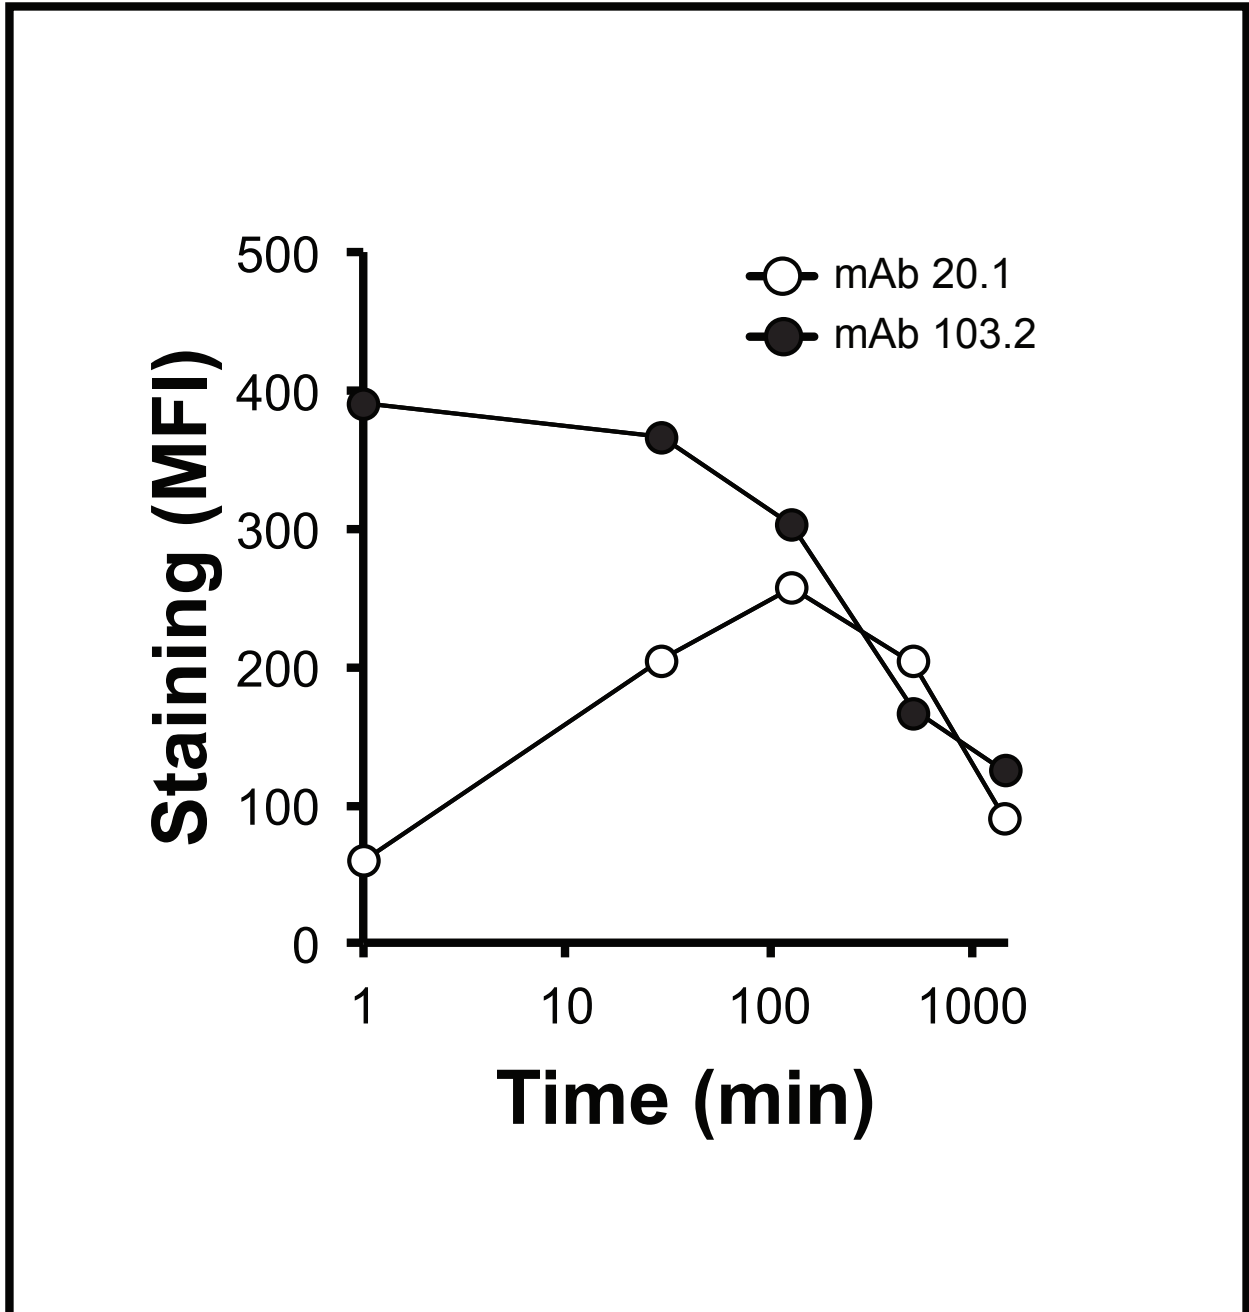

Supplementary Figure Legends:

**Supplementary Figure 1. Dimerization interfaces of the two BTN3A dimers.** The two dimer forms of BTN3A molecules are shown in ribbon format colored cyan and light cyan. Dimer 1 is shown at top and Dimer 2 at bottom; to the left are close-ups of the interface showing the residues involved in the interface. Hydrogen bonds (distance < 3.3Å) are shown as yellow dashed lines. The b-strands involved in the interface are labeled as shown.

**Supplementary Figure 2. Amino acid alignment of the extracellular domains of the three human BTN3A isoforms and the related BTN3A molecules from chimpanzee (*Pan troglodytes*), orangutan (*Pongo albei*), and macaque (*Macaca mulatta*).** Amino acid identity is shown as a “.” and differences from the consensus (human BTN3A1) are shown as capital letters. Residues contributing to Dimer 1 interface are colored yellow, those to Dimer 2 are colored lavender. The BTN3A epitope for the 20.1scFv and 103.2 scFv are designated with green and red stars, respectively. Grey arrows beneath the aligned sequences show the b-strands secondary structure and are labeled according to the conventional Ig-V and Ig-C designations.

**Supplementary Figure 3. Model of full-length 20.1 and 103.2 antibody binding to BTN3A.** Left panel shows our model of the full length 20.1 antibody binding to BTN3A based on our BTN3A-20.1 scFv complex crystal structure. Full length antibodies are shown as ribbon format in green, BTN3A dimers are shown as surface representation in cyan and light cyan. Fabs were superimposed on the scFvs and the Fc portions modeled based on the estimated linker distances between Fab and Fc. Dimer 1-20.1 model is shown at left: The 20.1 antibody binds to two BTN3A dimers due to the orientation of the scFv on BTN3A. This cross-linking of BTN3A dimers results in oligomerization of these molecules on the cell surface, with antibodies laying parallel to the cell surface. A model of the B30.2 intracellular domain is shown in light purple connected to the BTN3A extracellular domains via a single pass transmembrane helix. Right Panel shows the 103.2 full length antibody (shown in salmon) modeled onto a BTN3A Dimer 1 (cyan). Our model suggests a 1:1 binding stoichiometry of the 103.2 antibody to BTN3A dimer.

**Supplementary Figure 4. Kinetics of full-length 20.1 and 103.2 antibody staining on human T cells.** Human CD8<sup>+</sup> ab T cells were incubated with either 20.1 (open circles) or 103.2 (filled circles) mAbs (10 mg/ml) and incubated at 37°C for the indicated time points. Stainings were performed by using fluorochrome-conjugated secondary mAbs and analyzed by flow cytometry. MFI, geometric mean of fluorescence intensity. Data are representative of more than three experiments performed on various human cell lines.

Supplementary Table 1. BTN3A1 dimer interface contacts.

| Dimer 1 (symmetric)   |                |                       |                |         | Dimer 2 (asymmetric)     |                |                           |                |             |
|-----------------------|----------------|-----------------------|----------------|---------|--------------------------|----------------|---------------------------|----------------|-------------|
| BTN3A1 (A)            | Strand         | BTN3A1 (B)            | Strand         | Contact | BTN3A1 (A)               | Strand         | BTN3A1 (B)                | Strand         | Contact     |
| Asp120 <sup>Oδ2</sup> | A <sup>C</sup> | Thr203 <sup>N</sup>   | G <sup>C</sup> | H-bond  | Glu35 <sup>Oε1</sup>     | C <sup>V</sup> | Asp130 <sup>Oδ1</sup>     | A <sup>C</sup> | H-bond      |
| Asp120 <sup>Oδ2</sup> | A <sup>C</sup> | Thr203 <sup>Oγ1</sup> | G <sup>C</sup> | H-bond  | Glu35 <sup>Oε2</sup>     | C <sup>V</sup> | Asp130 <sup>Oδ2</sup>     | A <sup>C</sup> | H-bond      |
| Asp120                | A <sup>C</sup> | Thr203                | G <sup>C</sup> | VDW     | Glu35                    | C <sup>V</sup> | Asp130                    | A <sup>C</sup> | VDW         |
| Leu121 <sup>O</sup>   | A <sup>C</sup> | Ser205 <sup>N</sup>   | G <sup>C</sup> | H-bond  | Arg44                    | C <sup>V</sup> | Thr160                    | D <sup>C</sup> | VDW         |
| Leu121                | A <sup>C</sup> | Ser205                | G <sup>C</sup> | VDW     | Gln45                    | C <sup>V</sup> | Thr160                    | D <sup>C</sup> | VDW         |
| Leu121                | A <sup>C</sup> | Ala204                | G <sup>C</sup> | VDW     | Gln45                    | C <sup>V</sup> | Glu162                    | D <sup>C</sup> | VDW         |
| His122                | A <sup>C</sup> | Ser205                | G <sup>C</sup> | VDW     | Val46                    | C <sup>V</sup> | Pro159                    | D <sup>C</sup> | VDW         |
| Val123 <sup>N</sup>   | A <sup>C</sup> | Ser205 <sup>O</sup>   | G <sup>C</sup> | H-bond  | Val46 <sup>N</sup>       | C <sup>V</sup> | Thr160 <sup>O</sup>       | D <sup>C</sup> | H-bond      |
| Val123                | A <sup>C</sup> | Ser205                | G <sup>C</sup> | VDW     | Val46                    | C <sup>V</sup> | Thr160                    | D <sup>C</sup> | VDW         |
| Val123                | A <sup>C</sup> | Ile206                | G <sup>C</sup> | VDW     | Val46                    | C <sup>V</sup> | Val161                    | D <sup>C</sup> | VDW         |
| Val123 <sup>O</sup>   | A <sup>C</sup> | Ser207 <sup>N</sup>   | G <sup>C</sup> | H-bond  | Val46                    | C <sup>V</sup> | Lys129                    | A <sup>C</sup> | VDW         |
| Val123                | A <sup>C</sup> | Ser207                | G <sup>C</sup> | VDW     | Asp58 <sup>Oδ1</sup>     | C <sup>V</sup> | Lys129 <sup>Nζ</sup>      | A <sup>C</sup> | H-bond      |
| Asp124                | A <sup>C</sup> | Ser207                | G <sup>C</sup> | VDW     | Asp58 <sup>Oδ2</sup>     | C <sup>V</sup> | Lys129 <sup>Nζ</sup>      | A <sup>C</sup> | H-bond      |
| Asp124 <sup>Oδ1</sup> | A <sup>C</sup> | Ser207 <sup>O</sup>   | G <sup>C</sup> | H-bond  | Asp58 <sup>Oδ1,Oδ2</sup> | C <sup>V</sup> | Lys129 <sup>Nζ</sup>      | A <sup>C</sup> | Salt-Bridge |
| Val125 <sup>N</sup>   | A <sup>C</sup> | Ser207 <sup>O</sup>   | G <sup>C</sup> | H-bond  | Asp58                    | C <sup>V</sup> | Lys129                    | A <sup>C</sup> | VDW         |
| Val125                | A <sup>C</sup> | Ser207                | G <sup>C</sup> | VDW     | Asp58                    | C <sup>V</sup> | Val161                    | D <sup>C</sup> | VDW         |
| Val125                | A <sup>C</sup> | Ile208                | G <sup>C</sup> | VDW     | Arg59 <sup>Nη1,Nη2</sup> | C <sup>V</sup> | Asp130 <sup>Oδ1,Oδ2</sup> | A <sup>C</sup> | Salt-Bridge |
| Val125 <sup>O</sup>   | A <sup>C</sup> | Ala209 <sup>N</sup>   | G <sup>C</sup> | H-bond  | Arg59                    | C <sup>V</sup> | Asp130                    | A <sup>C</sup> | VDW         |
| Val125                | A <sup>C</sup> | Ala209                | G <sup>C</sup> | VDW     | Arg59                    | C <sup>V</sup> | Val161                    | D <sup>C</sup> | VDW         |
| Val125                | A <sup>C</sup> | Phe212                | G <sup>C</sup> | VDW     | Gln60                    | C <sup>V</sup> | Val161                    | D <sup>C</sup> | VDW         |
| Lys126                | A <sup>C</sup> | Phe212                | G <sup>C</sup> | VDW     | Ser61                    | C <sup>V</sup> | Thr160                    | D <sup>C</sup> | VDW         |
| Tyr128                | A <sup>C</sup> | Phe212                | G <sup>C</sup> | VDW     | Ser61                    | C <sup>V</sup> | Val161                    | D <sup>C</sup> | VDW         |
| Thr203 <sup>N</sup>   | G <sup>C</sup> | Asp120 <sup>Oδ2</sup> | A <sup>C</sup> | H-bond  | Ser61 <sup>Oγ</sup>      | C <sup>V</sup> | Glu162 <sup>N</sup>       | D <sup>C</sup> | H-bond      |
| Thr203 <sup>Oγ1</sup> | G <sup>C</sup> | Asp120 <sup>Oδ2</sup> | A <sup>C</sup> | H-bond  | Ser61                    | C <sup>V</sup> | Glu162                    | D <sup>C</sup> | VDW         |
| Thr203                | G <sup>C</sup> | Asp120                | A <sup>C</sup> | VDW     | Ala62 <sup>N</sup>       | C <sup>V</sup> | Glu162 <sup>O</sup>       | D <sup>C</sup> | H-bond      |
| Ala204                | G <sup>C</sup> | Leu121                | A <sup>C</sup> | VDW     | Ala62                    | C <sup>V</sup> | Glu162                    | D <sup>C</sup> | VDW         |
| Ser205 <sup>N</sup>   | G <sup>C</sup> | Leu121 <sup>O</sup>   | A <sup>C</sup> | H-bond  | Ala62                    | C <sup>V</sup> | Ala163                    | D <sup>C</sup> | VDW         |
| Ser205                | G <sup>C</sup> | Leu121                | A <sup>C</sup> | VDW     | Ala62                    | C <sup>V</sup> | Pro164                    | D <sup>C</sup> | VDW         |
| Ser205                | G <sup>C</sup> | His122                | A <sup>C</sup> | VDW     | Arg65                    | C <sup>V</sup> | Val161                    | D <sup>C</sup> | VDW         |
| Ser205 <sup>O</sup>   | G <sup>C</sup> | Val123 <sup>N</sup>   | A <sup>C</sup> | H-bond  | Arg65                    | C <sup>V</sup> | Pro164                    | D <sup>C</sup> | VDW         |
| Ser205                | G <sup>C</sup> | Val123                | A <sup>C</sup> | VDW     |                          |                |                           |                |             |
| Ile206                | G <sup>C</sup> | Val123                | A <sup>C</sup> | VDW     |                          |                |                           |                |             |
| Ser207 <sup>N</sup>   | G <sup>C</sup> | Val123 <sup>O</sup>   | A <sup>C</sup> | H-bond  |                          |                |                           |                |             |
| Ser207                | G <sup>C</sup> | Val123                | A <sup>C</sup> | VDW     |                          |                |                           |                |             |
| Ser207 <sup>O</sup>   | G <sup>C</sup> | Asp124 <sup>Oδ1</sup> | A <sup>C</sup> | H-bond  |                          |                |                           |                |             |
| Ser207                | G <sup>C</sup> | Asp124                | A <sup>C</sup> | VDW     |                          |                |                           |                |             |
| Ser207 <sup>O</sup>   | G <sup>C</sup> | Val125 <sup>N</sup>   | A <sup>C</sup> | H-bond  |                          |                |                           |                |             |
| Ile208                | G <sup>C</sup> | Val125                | A <sup>C</sup> | VDW     |                          |                |                           |                |             |
| Ala209 <sup>N</sup>   | G <sup>C</sup> | Val125 <sup>O</sup>   | A <sup>C</sup> | H-bond  |                          |                |                           |                |             |
| Ala209                | G <sup>C</sup> | Val125                | A <sup>C</sup> | VDW     |                          |                |                           |                |             |
| Phe212                | G <sup>C</sup> | Val125                | A <sup>C</sup> | VDW     |                          |                |                           |                |             |
| Phe212                | G <sup>C</sup> | Lys126                | A <sup>C</sup> | VDW     |                          |                |                           |                |             |
| Phe212                | G <sup>C</sup> | Tyr128                | A <sup>C</sup> | VDW     |                          |                |                           |                |             |

**Supplementary Table 2: Interface Contacts of BTN3A1/20.1 complex**

| <b>Light Chain</b>  |                        |                | <b>Heavy Chain</b>    |                            |                |
|---------------------|------------------------|----------------|-----------------------|----------------------------|----------------|
| <u>CDR1</u>         | <u>BTN3A1</u>          | <u>Contact</u> | <u>CDR1</u>           | <u>BTN3A1</u>              | <u>Contact</u> |
| Trp32               | Arg59§                 | VDW            | Thr161                | Ala62§                     | VDW            |
|                     |                        |                | Thr161                | Pro63§                     | VDW            |
| <u>CDR3</u>         | <u>BTN3A1</u>          | <u>Contact</u> | Arg162 <sup>O</sup>   | Gln45 <sup>Ne2</sup> §     | H-bond         |
| Gly91               | Arg59§                 | VDW            | Tyr164                | Gln60§                     | VDW            |
| Gly91 <sup>O</sup>  | Arg59 <sup>Nη1</sup> § | H-bond         | Tyr164 <sup>On</sup>  | Gln60 <sup>O</sup> §       | H-bond         |
| His92               | Asp58§                 | VDW            | Tyr164                | Ser61§                     | VDW            |
| Ser93               | Asp58§                 | VDW            | Tyr164                | Ala62§                     | VDW            |
| Tyr94               | Asp58§                 | VDW            | Tyr164 <sup>On</sup>  | Ala62 <sup>N</sup> §       | H-bond         |
| Tyr94               | Arg65§                 | VDW            | Tyr164                | Arg65§                     | VDW            |
| Tyr94 <sup>On</sup> | Arg65 <sup>Nη2</sup> § | H-bond         | Tyr164 <sup>On</sup>  | Arg65 <sup>Ne,Nη1</sup> §  | H-bond         |
|                     |                        |                | <u>CDR2</u>           | <u>BTN3A1</u>              | <u>Contact</u> |
|                     |                        |                | Glu181                | Arg65§                     | VDW            |
|                     |                        |                | Glu181 <sup>Oε2</sup> | Arg65 <sup>Nη1</sup> §     | H-bond         |
|                     |                        |                | Glu181 <sup>Oε2</sup> | Arg65 <sup>Nη1,Nη2</sup> § | Salt-bridge    |
|                     |                        |                | Asn183                | Ala62§                     | VDW            |
|                     |                        |                | Asn183 <sup>Nδ2</sup> | Ala62 <sup>O</sup> §       | H-bond         |
|                     |                        |                | Asn185                | Ala62§                     | VDW            |
|                     |                        |                | Asn185                | Pro63                      | VDW            |
|                     |                        |                | Lys190                | Glu57                      | VDW            |
|                     |                        |                | Lys190 <sup>Nζ</sup>  | Glu57 <sup>Oε2</sup>       | H-bond         |
|                     |                        |                | Lys190 <sup>Nζ</sup>  | Glu57 <sup>Oε1,Oε2</sup>   | Salt-bridge    |
|                     |                        |                | <u>CDR3</u>           | <u>BTN3A1</u>              | <u>Contact</u> |
|                     |                        |                | Gly235                | Gln45§                     | VDW            |
|                     |                        |                | Gly235                | Ser61§                     | VDW            |
|                     |                        |                | Gly235 <sup>O</sup>   | Ser61 <sup>OY</sup> §      | H-bond         |
|                     |                        |                | Thr236                | Val46§                     | VDW            |
|                     |                        |                | Thr236                | Arg59§                     | VDW            |
|                     |                        |                | Thr236 <sup>OY1</sup> | Arg59 <sup>Nη1</sup> §     | H-bond         |
|                     |                        |                | Pro237                | Asp58§                     | VDW            |
|                     |                        |                | Pro237                | Arg59§                     | VDW            |
|                     |                        |                | Pro237 <sup>O</sup>   | Arg59 <sup>Nη1,Nη2</sup> § | H-bond         |

§ interface residues for BTN3A dimer 2.
